# Supplementary material
Source: PubMed Central journal article supplement (PMC4074079)
Supplement: NIHMS589875-supplement-supplement_1.pdf [file NIHMS589875-supplement-supplement_1.pdf]

## Supplement: Place Category Descriptions

| Place Category                                   | Sub-Category | Description                                                                                                                                                                                                                                                                                                                                                                                                                                                                                                                                                                                                                                                                                         |
|--------------------------------------------------|--------------|-----------------------------------------------------------------------------------------------------------------------------------------------------------------------------------------------------------------------------------------------------------------------------------------------------------------------------------------------------------------------------------------------------------------------------------------------------------------------------------------------------------------------------------------------------------------------------------------------------------------------------------------------------------------------------------------------------|
| 1. Home                                          |              | The home address previously identified during the neighborhood selection process stands alone here, with all other parents' and guardians' home that are separate listed under <i>others' homes</i> . If parent lists 'front yard' or 'backyard' in place log, this is also considered <i>home</i> .                                                                                                                                                                                                                                                                                                                                                                                                |
| 2. School                                        |              | The child's school in which they are currently enrolled also stands alone here (even if child wore the accelerometer during school vacations). If a child is home schooled and attends any home school co-op, this would be considered <i>school</i> .                                                                                                                                                                                                                                                                                                                                                                                                                                              |
| 3. Neighborhood                                  |              | This category includes only entries that specifically say 'neighborhood' with no specific address noted, as per place log instructions to parents.<br>All place log entries with no specific location or address <i>and do not specify 'neighborhood'</i> (e.g., bike riding, walked dog, trick or treating) are also included here. Rationale: Place log entries with no specific address fall under the realm of 'neighborhood' (as this was the only entry whereby parents were permitted to provide no address, as by definition being out in the neighborhood does not have a specific address). If any of these entries occurred at a specific place, parents would indicate with an address. |
| 4. Others' Homes                                 |              | This category includes relatives (including separate parent/guardian households not identified as the primary address), friends', neighbors', and babysitter's homes.                                                                                                                                                                                                                                                                                                                                                                                                                                                                                                                               |
| 5. Other Schools                                 |              | This includes schools that are not identified as the child's school in which they are enrolled. This category also includes colleges and universities.                                                                                                                                                                                                                                                                                                                                                                                                                                                                                                                                              |
| 6. Public, Outdoor Parks & Recreation Facilities |              | For parks, this includes all parks, general and more specific (e.g., skate park, dog park), and any other park features (e.g., basketball court, tennis court, sports fields). Other outdoor recreational locations (including national/state parks, lakes, beaches, ski/snow locations, trails, conservatories, and gardens) are included here, too.<br>Outdoor public pools and water-play areas (likely a park feature) are included.                                                                                                                                                                                                                                                            |

| Place Category                          | Sub-Category | Description                                                                                                                                                                                                                                                                                                                                                                                                                                                                                                                                                                                                                                                                                                  |
|-----------------------------------------|--------------|--------------------------------------------------------------------------------------------------------------------------------------------------------------------------------------------------------------------------------------------------------------------------------------------------------------------------------------------------------------------------------------------------------------------------------------------------------------------------------------------------------------------------------------------------------------------------------------------------------------------------------------------------------------------------------------------------------------|
| 7. Public, Indoor Recreation Facilities |              | <p>This category includes community centers, YMCAs, and Boys &amp; Girls Clubs.</p> <p>Indoor public pools and facilities are included here, too.</p>                                                                                                                                                                                                                                                                                                                                                                                                                                                                                                                                                        |
| 8. Private Recreation Facilities        |              | <p>This category is comprised of leisure places of activity (e.g., bowling alley, golf course), gyms (e.g., 24 Hour Fitness), martial arts, dance studios, and other private activity lessons/locations, private clubs that are social but more likely geared toward physical activity (e.g., tennis and beach clubs), and water parks.</p>                                                                                                                                                                                                                                                                                                                                                                  |
| 9. Service Locations                    |              | <p>This category includes: libraries, post offices, hospitals, military bases (but <i>excludes</i> commissaries), banks/credit unions, hotels, cemeteries/mortuaries, transportation centers or stops (e.g., train, bus, airport, ferry terminal, marina), movie theaters, religious organizations, international schools, language schools, religious schools, car washes, veterinary/humane societies, video rental stores, recycle/waste centers, nursing homes, and government agencies.</p> <p>Other locations encompassed here are art, music, drama, therapeutic (e.g., speech therapy) lesson locations, tutoring, Brownies &amp; Cub Scouts, 4-H Club, before/after care &amp; daycare centers.</p> |
|                                         |              | <p>Other errand locations like going to a parent or other person's work, appointments such as dental or orthodontic exams, eye or doctor's appointment, haircut, etc. are included in this category.</p>                                                                                                                                                                                                                                                                                                                                                                                                                                                                                                     |
|                                         |              | <p>Any reports of 'waiting' (e.g., waiting in car, waiting for brother) are also included here.</p> <p>Cultural centers and special outings (e.g., museums, music halls, stadiums like Safeco Field or Petco Field, amusement parks, zoos, aquariums, parades, fairs, holiday-based outings like tree lot and pumpkin patch) are listed here. Other private social clubs that are not geared for physical activity (e.g., yacht and boat clubs) are included here.</p>                                                                                                                                                                                                                                       |
| 10. Nondescript Geographic Locations    |              | <p>Includes daytrips and large geographical locations without descriptive types of places (and/or specific addresses outside of the participant's neighborhood). Examples of this include 'Downtown Seattle,' where it is unknown where specifically participants went.</p>                                                                                                                                                                                                                                                                                                                                                                                                                                  |

(continued)

## Supplement (continued)

| Place Category    | Sub-Category               | Description                                                                                                                                                                                                                                                                                                                                                                                  |
|-------------------|----------------------------|----------------------------------------------------------------------------------------------------------------------------------------------------------------------------------------------------------------------------------------------------------------------------------------------------------------------------------------------------------------------------------------------|
| 11. Shopping      | Non-Food Shopping          | This category includes all nonfood shopping (e.g., clothing stores), shopping centers and malls, dollar stores, automotive stores, drugstores/pharmacies, electronics stores, big box stores (e.g., Wal-Mart, Target), hardware stores, and waterfront centers like an embarcadero.                                                                                                          |
|                   | Convenience Stores         | This includes 7-11 and all other convenience stores previously identified for the purpose of NEMS-S food enumeration (see Glanz, et al., 2007 for further information).                                                                                                                                                                                                                      |
|                   | Markets and Produce Stores | This includes public markets, farmers' markets and any other locations previously identified for the purpose of NEMS-S food enumeration (see Glanz, et al., 2007 for further information).                                                                                                                                                                                                   |
|                   | Grocery Stores             | All grocery stores and supermarkets are included here, as well as any others previously identified for the purpose of NEMS-S food enumeration. Large club stores (e.g., Costco, Sam's Club) are included here since they are primarily food shopping-focused. Armed forces commissaries and grocery store outlets are included here, too. (See Glanz, et al., 2007 for further information). |
| 12. Food Eateries | Fast Food Restaurants      | All fast food chains and other locations identified for the purpose of NEMS-R food enumeration (see Saelens, et al., 2007 for further information).                                                                                                                                                                                                                                          |
|                   | Sit-Down Restaurants       | Local and chain sit-down restaurants are included here, as defined and identified for the purpose of NEMS-R food enumeration. Buffets and Fast Casual Restaurants noted as separate categories in NEMS-R food enumeration are included here. (See Saelens et al., 2007 for further information).                                                                                             |
|                   | Specialty Food Shops       | Bakery, donuts, ice cream, cookies, and juice shops, specialty markets, coffee shops, bagel shops (both independent and chain locations) identified for the purpose of NEMS-S food enumeration are included here (see Glanz, et al., 2007 for further information).                                                                                                                          |

2. Burdette HL, Whitaker RC, Daniels SR. Parental report of outdoor playtime as a measure of physical activity in preschool-aged children. *Arch Pediatr Adolesc Med*. 2004 Apr;158(4):353–357. [PubMed doi:10.1001/archpedi.158.4.353](#)
3. Corder K, Sallis JF, Crespo NC, Elder JP. Active children use more locations for physical activity. *Health Place*. 2011 Jul;17(4):911–919. [PubMed doi:10.1016/j.healthplace.2011.04.008](#)
4. Dunton GF, Liao Y, Intille S, Wolch J, Pentz MA. Physical and social contextual influences on children's leisure-time physical activity: An ecological momentary assessment study. *J Phys Act Health*. 2011 Jan;8 Suppl 1:S103–S108. [PubMed](#)
5. Foster S, Giles-Corti B. The built environment, neighborhood crime and constrained physical activity: An exploration of inconsistent findings. *Prev Med*. 2008 Sep;47(3):241–251. [PubMed doi:10.1016/j.ypmed.2008.03.017](#)
6. Foster S, Giles-Corti B, Knuiam M. Neighbourhood design and fear of crime: A socio-ecological examination of the correlates of residents' fear in new suburban housing developments. *Health Place*. 2010 Nov;16(6):1156–1165. [PubMed doi:10.1016/j.healthplace.2010.07.007](#)
7. Frank LD, Engelke PO, Schmid TL. *Health and Community Design: The Impact of the Built Environment on Physical Activity*. Washington: Island Press, 2003.
8. Frank LD, Saelens BE, Chapman J, et al. Objective assessment of obesogenic environments in youth: GIS methods and spatial findings from the Neighborhood Impact on Kids (NIK) Study. *Am J Prev Med*. 2012 May;42(5):e47–55. [10.1016/j.amepre.2012.02.006](#). [PubMed](#)
9. Freedson P, Pober D, Janz KF. Calibration of accelerometer output for children. *Med Sci Sports Exerc*. 2005 Nov;37(11 Suppl):S523–30. [PubMed doi:10.1249/01.mss.0000185658.28284.ba](#)
10. Glanz K, Sallis JF, Saelens BE, Frank LD. Frank. Nutrition Environment Measures Survey in stores (NEMS-S): Development and evaluation. *Am J Prev Med*. 2007 Apr;32(4):282–289. [PubMed doi:10.1016/j.amepre.2006.12.019](#)
11. Grow HM, Saelens BE, Kerr J, Durant NH, Norman GJ, Sallis JF. Where are youth active? Roles of proximity, active transport, and built environment. *Med Sci Sports Exerc*. 2008 Dec;40(12):2071–2079. [PubMed doi:10.1249/MSS.0b013e3181817baa](#)
12. Handy S, Cao X, Mokhtarian PL. Self-selection in the relationship between the built environment and walking. *J Am Plann Assoc*. 2006;72(1):55–74. [doi:10.1080/01944360608976724](#)
13. Krenn PJ, Titze S, Oja P, Jones A, Ogilvie D. Use of global positioning systems to study physical activity and the environment: A systematic review. *Am J Prev Med*. 2011 Nov;41(5):508–515. [PubMed doi:10.1016/j.amepre.2011.06.046](#)
14. Leek D, Carlson JA, Cain KL, et al. Physical activity during youth sports practices. *Arch Pediatr Adolesc Med*. 2011 Apr;165(4):294–299. [PubMed doi:10.1001/archpediatrics.2010.252](#)
15. Mackett RL, Lucas L, Paskins J, Turbin J. The therapeutic value of children's everyday travel. *Transport Res A*. 2005;39:205–219.
16. Mackett RL, Paskins J. Children's physical activity: The contribution of playing and walking. *Child Society*. 2008;22:345–357. [doi:10.1111/j.1099-0860.2007.00113.x](#)
17. Nader PR, Bradley RH, Houts RM, McRitchie SL, O'Brien M. Moderate-to-vigorous physical activity from ages 9 to 15 years. *JAMA*. 2008 Jul 16;300(3):295–305. [PubMed doi:10.1001/jama.300.3.295](#)
18. O'Campo P, Salmon C, Burke J. Neighbourhoods and mental well-being: What are the pathways? *Health Place*. 2009 Mar;15(1):56–68. [PubMed doi:10.1016/j.healthplace.2008.02.004](#)
19. Physical Activity Guidelines Advisory Committee. *Physical Activity Guidelines Advisory Committee Report, 2008*. Washington, DC: US Department of Health & Human Services, 2008.

20. Rosenberg D, Ding D, Sallis JF, et al. Neighborhood Environment Walkability Scale for Youth (NEWS-Y): Reliability and relationship with physical activity. *Prev Med* 2009 Aug-Sep;49(2-3):213–218. [PubMed doi:10.1016/j.ypmed.2009.07.011](#)
21. Saelens BE, Glanz K, Sallis JF, Frank LD. Nutrition environment measures study in restaurants (NEMS-R): Development and evaluation. *Am J Prev Med*. 2007 Apr;32(4):273–281. [PubMed doi:10.1016/j.amepre.2006.12.022](#)
22. Saelens BE, Sallis JF, Frank LD, et al. Obesogenic neighborhood environments related to child and parent obesity: The Neighborhood Impact on Kids (NIK) Study. *Am J Prev Med*. 2012 May;42(5):e57–64. [10.1016/j.amepre.2012.02.008](#). [PubMed doi:10.1016/j.amepre.2012.02.008](#)
23. Sallis JF, Saelens BE, Frank LD, et al. Neighborhood built environment and income: Examining multiple health outcomes. *Soc. Sci. Med*. 2009 Apr;68(7):1285–1293. [PubMed doi:10.1016/j.socscimed.2009.01.017](#)
24. Sampson RJ, Raudenbush SW, Earls F. Neighborhood and violent crime: A multilevel study of collective efficacy. *Science*. 1997 Aug 15;277(5328):918–924. [PubMed doi:10.1126/science.277.5328.918](#)
25. Sturm R. Childhood obesity—What can we learn from existing data on societal trends, part1. *Prev Chronic Dis* [Internet]. 2005 [cited 2011 December 4]; 2(1). Available from: [http://www.cdc.gov/pcd/issues/2005/jan/04\\_0038.htm](http://www.cdc.gov/pcd/issues/2005/jan/04_0038.htm).
26. Troiano RP, Berrigan D, Dodd KW, Mâsse LC, Tilert T, McDowell M. Physical activity in the United States measured by accelerometer. *Med Sci Sports Exerc*. 2008 Jan;40(1):181–188. [PubMed](#)
27. Trost SG, Loprinzi PD, Moore R, Pfeiffer KA. Comparison of accelerometer cut points for predicting activity intensity in youth. *Med Sci Sports Exerc*. 2011 Jul;43(7):1360–1368. [PubMed doi:10.1249/MSS.0b013e318206476e](#)
28. Valentine G, McKendrick J. Children’s outdoor play: Exploring parental concerns about children’s safety and the changing nature of childhood. *Geoforum*. 1997;28(2):219–235. [doi:10.1016/S0016-7185\(97\)00010-9](#)
29. Veitch J, Bagley S, Ball K, Salmon J. Where do children usually play? A qualitative study of parents’ perceptions of influences on children’s active free-play. *Health Place*. 2006 Dec;12(4):383–393. [PubMed doi:10.1016/j.healthplace.2005.02.009](#)
30. Wall MI, Carlson SA, Stein AD, Lee SM, Fulton JE. Trends by age in youth physical activity: Youth Media Campaign Longitudinal Survey. *Med Sci Sports Exerc*. 2011 Nov;43(11):2140–2147. [PubMed doi:10.1249/MSS.0b013e31821f561a](#)
31. Wilson DK, Lawman HG, Segal M, Chappell S. Neighborhood and parental supports for physical activity in minority adolescents. *Am J Prev Med*. 2011 Oct;41(4):399–406. [PubMed doi:10.1016/j.amepre.2011.06.037](#)
32. Ziviani J, Wadley D, Ward H, Macdonald D, Jenkins D, Rodger S. A place to play: Socioeconomic and spatial factors in children’s physical activity. *Aust Occup Ther J*. 2008 Mar;55(1):2–11. [PubMed doi:10.1111/j.1440-1630.2006.00646.x](#)
